# Supplementary material
Source: Springer Nature journal article supplement (https://www.springermedizin.de/resource/supplementary/13020_2013_207_MOESM5_ESM.pdf/9641206)

(A)

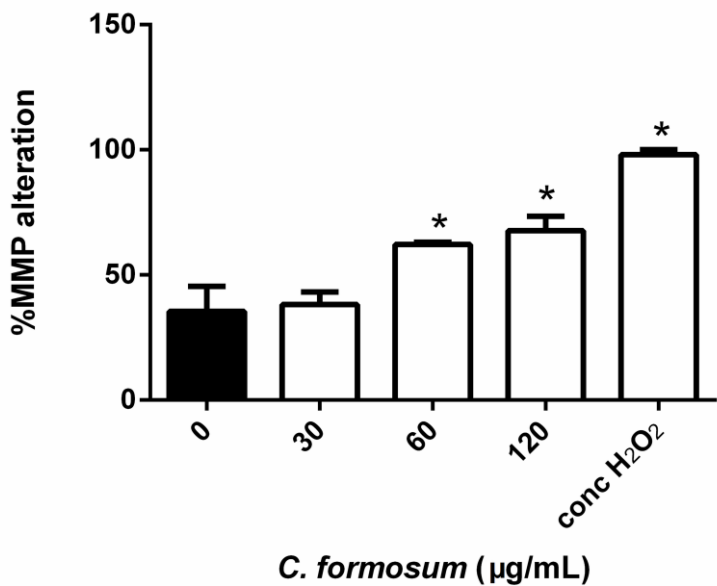

(B)

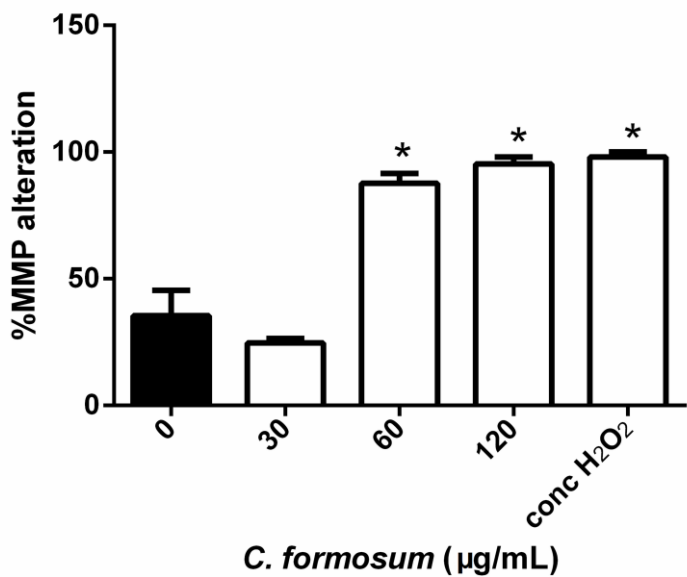

Supplement: MOESM5 [file 9641206]
